# Supplementary material for: Characterization and variation of the rhizosphere fungal community structure of cultivated tetraploid cotton
Source: PLoS One. 2019 Oct 18;14(10):e0207903. doi: 10.1371/journal.pone.0207903 (PMC6799950; doi:10.1371/journal.pone.0207903)
Supplement: S11 Table — (XLS) [file pone.0207903.s019.xls]

## Sheet: Sheet1
Supplementary Table S11. Beta diversity between samples.
bray-curtis
	NfT	NfX	NbT	NbX	NsT	NsX
NfT	0	0.560369	0.741843	0.754646	0.451023	0.316587
NfX	0.560369	0	0.690836	0.66033	0.65301	0.675313
NbT	0.741843	0.690836	0	0.398548	0.635377	0.721433
NbX	0.754646	0.66033	0.398548	0	0.697019	0.784452
NsT	0.451023	0.65301	0.635377	0.697019	0	0.388819
NsX	0.316587	0.675313	0.721433	0.784452	0.388819	0
	FfT	FfX	FbT	FbX	FsT	FsX
FfT	0	0.542277	0.468645	0.567	0.721777	0.598125
FfX	0.542277	0	0.693348	0.621587	0.786839	0.72328
FbT	0.468645	0.693348	0	0.506711	0.574021	0.540751
FbX	0.567	0.621587	0.506711	0	0.525641	0.465972
FsT	0.721777	0.786839	0.574021	0.525641	0	0.40402
FsX	0.598125	0.72328	0.540751	0.465972	0.40402	0
	FfT	FfX	FbT	FbX	FsT	FsX
NfT	0.97795	0.981644	0.965444	0.974737	0.973315	0.970596
NfX	0.966305	0.977789	0.950553	0.957827	0.955429	0.946331
NbT	0.966924	0.976986	0.960087	0.967269	0.966603	0.958228
NbX	0.974278	0.981024	0.964561	0.97125	0.968576	0.960706
NsT	0.965869	0.974645	0.943061	0.953157	0.955119	0.951758
NsX	0.974187	0.981185	0.949337	0.967487	0.967842	0.964251
Note: N: nutrient-rich soil, F: continuous cropping field soil
s: seedling stage, b: budding stage, f: flowering stage
T: upland cotton (Gossypium hirsutum L. cv. TM-1),
X: island cotton (Gossypium barbadense L.cv. Hai7124),

## Sheet: Sheet2
contribution of each factors to the varition of rhizosphere fungal community in species level
factor	Mean Sq	P-value
soil type	0.06684	0.0452	*	0.422663
development stage	0.02167	0.2564		0.13703
genotype	0.02104	0.2485		0.133047
S:D	0.01573	0.3671		0.0994688
S:G	0.00215	0.7091		0.0135955
D:G	0.03071	0.1511		0.194195
note:
‘***’：<= 0.001
‘**’：<=0.01
‘*’：<=0.05
‘.’：<=0.1
S:D interaction effect of soil type and development stage
S:G interaction effect of soil type and genotype
D:G interaction effect of development stage and genotype
